# Supplementary material
Source: PubMed Central journal article supplement (PMC5915182)
Supplement: EHP1314.s001.acco.pdf [file EHP1314.s001.acco.pdf]

**Note to readers with disabilities:** *EHP* strives to ensure that all journal content is accessible to all readers. However, some figures and Supplemental Material published in *EHP* articles may not conform to [508 standards](#) due to the complexity of the information being presented. If you need assistance accessing journal content, please contact [ehp508@niehs.nih.gov](mailto:ehp508@niehs.nih.gov). Our staff will work with you to assess and meet your accessibility needs within 3 working days.

### **Supplemental Material**

#### **Prenatal Exposure to Nonpersistent Endocrine Disruptors and Behavior in Boys at 3 and 5 Years**

Claire Philippat, Dorothy Nakiwala, Antonia M. Calafat, Jérémie Botton, Maria De Agostini, Barbara Heude, Rémy Slama and the EDEN Mother-Child Study Group

#### **Table of Contents**

**Table S1:** Scoring of the Strengths and Difficulties Questionnaire

**Table S2:** Spearman correlation coefficients between SDQ scores assessed at 3 and 5 years among boys of the EDEN mother-child cohort

**Table S3:** Concentrations of phenols and phthalate metabolites in maternal urine (n = 546 mother-son pairs of the French EDEN cohort)

**Table S4:** Spearman correlation coefficients between biomarker concentrations measured in maternal urine (n = 546 mother-son pairs of EDEN mother-child cohort)

**Table S5:** Adjusted associations between phenols, phthalate metabolites and behavior at 3 years among boys of the EDEN mother-child cohort (N = 518 to 520 mother-son pairs, depending of the subscale). Analysis simultaneously adjusted for all phenols and phthalate metabolites assessed in our study population

**Table S6:** Adjusted associations between phenols, phthalate metabolites and behavior at 5 years among boys of the EDEN mother-child cohort (N = 457 to 458 mother-son pairs, depending of the subscale). Analysis simultaneously adjusted for all phenols and phthalate metabolites assessed in our study population

**Table S7:** Associations between phenols, phthalate metabolites and behavior at 3 years corrected for exposure measurement error using the a posteriori disattenuation method (N = 518 to 520 mother-son pairs, depending of the subscale)

**Table S8:** Associations between phenols, phthalate metabolites and behavior at 5 years corrected for exposure measurement error using the a posteriori disattenuation method (N = 457 to 458 mother-son pairs, depending of the subscale)

**Table S9:** Associations between phenols, phthalate metabolites and dichotomized SDQ scores at 3 years corrected for exposure measurement error using the a posteriori disattenuation method (N = 518 to 520 mother-son pairs, depending of the subscale)

**Table S10:** Associations between phenols, phthalate metabolites and dichotomized SDQ scores at 5 years corrected for exposure measurement error using the a posteriori disattenuation method (N = 518 to 520 mother-son pairs, depending of the subscale)

**Table S11:** Overview of the results from previous studies that explored the associations between prenatal exposure to bisphenol A and child behavior using assessments similar to the one used in our study

## **References**

Table S1: Scoring of the Strengths and Difficulties Questionnaire

| <b>Clinical behaviors<br/>(score ranges: 0-20)</b> | <b>Subscale<br/>(score ranges: 0-10)</b> | <b>Items used to compute each subscale<br/>(score ranges: 0-3)</b>                                                                                                                       |
|----------------------------------------------------|------------------------------------------|------------------------------------------------------------------------------------------------------------------------------------------------------------------------------------------|
| Internalizing behavior                             | Emotional symptoms                       | Often complains of headaches<br>Many worries<br>Often unhappy, downhearted<br>Nervous or clingy in new situations<br>Many fears, easily scared                                           |
|                                                    | Peer relationship problems               | Rather solitary, tends to play alone<br>Has at least one good friend<br>Generally liked by other children<br>Picked on or bullied<br>Gets on better with adults than with other children |
| Externalizing behavior                             | Conduct problems                         | Often has temper tantrums or hot tempers<br>Generally obedient<br>Often fights with other children<br>Often argumentative with adults<br>Can be spiteful to others                       |
|                                                    | Hyperactivity /Inattention problems      | Restless, overactive<br>Constantly fidgeting or squirming<br>Easily distracted, concentration wanders<br>Can stop and think things out before acting<br>Sees tasks through to the end    |
|                                                    | Prosocial behavior                       | Considerate of other people's feelings<br>Shares readily with other children<br>Helpful if someone is hurt<br>Kind to younger children<br>Often volunteers to help others                |

The Strengths and Difficulties Questionnaire can be uploaded online (The Strengths and Difficulties Questionnaire website).

Table S2: Spearman correlation coefficients between SDQ scores assessed at 3 and 5 years among boys of the EDEN mother-child cohort

| <b>SDQ scores</b>          | <b>Spearman correlation coefficients<br/>between the assessments<br/>performed at 3 and 5 years</b> |
|----------------------------|-----------------------------------------------------------------------------------------------------|
| Emotional symptoms         | 0.41                                                                                                |
| Conduct problems           | 0.59                                                                                                |
| Peer relationship problems | 0.37                                                                                                |
| Hyperactivity-inattention  | 0.62                                                                                                |
| Prosocial behavior         | 0.46                                                                                                |
| Internalizing behavior     | 0.51                                                                                                |
| Externalising behavior     | 0.66                                                                                                |

Table S3: Concentrations of phenols and phthalate metabolites in maternal urine (n = 546 mother-son pairs of the French EDEN cohort)

| Biomarker                                                                  | Abbreviation             | LOD<br>( $\mu\text{g/L}$ ) | % <<br>LOD | GM    | Percentiles      |                  |                  |
|----------------------------------------------------------------------------|--------------------------|----------------------------|------------|-------|------------------|------------------|------------------|
|                                                                            |                          |                            |            |       | 33 <sup>th</sup> | 50 <sup>th</sup> | 66 <sup>th</sup> |
| 2,4-dichlorophenol                                                         | 2,4-dichlorophenol       | 0.2                        | 2          | 1.16  | 0.73             | 0.99             | 1.42             |
| 2,5-dichlorophenol                                                         | 2,5-dichlorophenol       | 0.2                        | 0          | 12.90 | 5.38             | 9.42             | 17.0             |
| <i>Sum of dichlorophenol concentrations (<math>\mu\text{mol/L}</math>)</i> | $\Sigma$ dichlorophenols | -                          | -          | 0.09  | 0.04             | 0.07             | 0.11             |
| Bisphenol A                                                                |                          | 0.4                        | 0          | 2.50  | 1.74             | 2.37             | 3.10             |
| Benzophenone-3                                                             |                          | 0.4                        | 7          | 3.06  | 1.39             | 2.32             | 3.96             |
| Triclosan                                                                  |                          | 2.3                        | 19         | 23.7  | 7.09             | 28.2             | 99.7             |
| Methyl paraben                                                             |                          | 1                          | 0          | 104   | 52.4             | 112              | 200              |
| Ethyl paraben                                                              |                          | 1                          | 26         | 3.07  | 1.39             | 3.70             | 9.70             |
| Propyl paraben                                                             |                          | 0.2                        | 1          | 12.5  | 5.41             | 14.3             | 30.9             |
| Butyl paraben                                                              |                          | 0.2                        | 14         | 2.23  | 0.77             | 2.13             | 5.61             |
| <i>Sum of paraben concentrations (<math>\mu\text{mol/L}</math>)</i>        |                          | -                          | -          | 0.87  | 0.42             | 0.95             | 1.72             |
| Monoethyl phthalate ( $\mu\text{g/L}$ )                                    | MEP                      | 0.6                        | 0          | 109   | 65.4             | 97.0             | 154              |
| Mono-n-butyl phthalate ( $\mu\text{g/L}$ )                                 | MBP                      | 0.2                        | 0          | 51.1  | 33.1             | 44.2             | 57.2             |
| Mono-isobutyl phthalate ( $\mu\text{g/L}$ )                                | MiBP                     | 0.2                        | 0          | 42.3  | 29.3             | 40.1             | 56.8             |
| Mono(2-ethyl-5-carboxypentyl) phthalate ( $\mu\text{g/L}$ )                | MECPP                    | 0.2                        | 0          | 40.8  | 27.9             | 38.4             | 50.3             |
| Mono(2-ethyl-5-hydroxyhexyl) phthalate ( $\mu\text{g/L}$ )                 | MEHHP                    | 0.2                        | 0          | 26.8  | 18.8             | 26.8             | 35.1             |
| Mono(2-ethyl-5-oxohexyl) phthalate ( $\mu\text{g/L}$ )                     | MEOHP                    | 0.2                        | 0          | 22.3  | 15.6             | 22.4             | 29.3             |
| Mono(2-ethylhexyl) phthalate ( $\mu\text{g/L}$ )                           | MEHP                     | 0.5                        | 2          | 7.46  | 5.08             | 7.44             | 10.8             |
| <i>Sum of DEHP concentrations (<math>\mu\text{mol/L}</math>)</i>           | $\Sigma$ DEHP            | -                          | -          |       | 0.24             | 0.32             | 0.42             |
| Monobenzyl phthalate ( $\mu\text{g/L}$ )                                   | MBzP                     | 0.3                        | 0          | 19.9  | 12.8             | 18.4             | 26.6             |
| Monocarboxy-isooctyl phthalate ( $\mu\text{g/L}$ )                         | MCOP                     | 0.2                        | 0          | 4.13  | 2.85             | 3.90             | 5.37             |
| Mono(3-carboxypropyl) phthalate ( $\mu\text{g/L}$ )                        | MCCP                     | 0.2                        | 0          | 2.17  | 1.50             | 1.94             | 2.60             |
| Monocarboxy-isononyl phthalate ( $\mu\text{g/L}$ )                         | MCNP                     | 0.2                        | 0          | 1.54  | 0.97             | 1.27             | 1.72             |
| Creatinine                                                                 | -                        | -                          | -          | 1.00  | 0.86             | 1.04             | 1.22             |

Abbreviation: GM: geometric mean, LOD: limit of detection

<sup>a</sup> Concentrations standardized for sampling conditions and creatinine concentration (Mortamais et al. 2012)

<sup>b</sup> Includes mother-child pairs that have biomarker assessments and SDQ scores at 3 or 5 years

Table S4: Spearman correlation coefficients between biomarker concentrations measured in maternal urine (n = 546 mother-son pairs of EDEN mother-child cohort)

|                | 2,4-DCP | 2,5-DCP | BPA   | BP3  | TCS   | MP    | EP    | PP    | BP    | MEP  | MBP  | MiBP | MCPP | MBzP | MEHP | MEOHP | MEHHP | MECPP | MCOP | MCNP |  |
|----------------|---------|---------|-------|------|-------|-------|-------|-------|-------|------|------|------|------|------|------|-------|-------|-------|------|------|--|
| <b>2,4-DCP</b> | 1.00    |         |       |      |       |       |       |       |       |      |      |      |      |      |      |       |       |       |      |      |  |
| <b>2,5-DCP</b> | 0.69    | 1.00    |       |      |       |       |       |       |       |      |      |      |      |      |      |       |       |       |      |      |  |
| <b>BPA</b>     | -0.01   | -0.01   | 1.00  |      |       |       |       |       |       |      |      |      |      |      |      |       |       |       |      |      |  |
| <b>BP3</b>     | 0.12    | 0.10    | 0.04  | 1.00 |       |       |       |       |       |      |      |      |      |      |      |       |       |       |      |      |  |
| <b>TCS</b>     | 0.38    | 0.02    | -0.06 | 0.13 | 1.00  |       |       |       |       |      |      |      |      |      |      |       |       |       |      |      |  |
| <b>MP</b>      | 0.08    | 0.02    | -0.02 | 0.20 | 0.15  | 1.00  |       |       |       |      |      |      |      |      |      |       |       |       |      |      |  |
| <b>EP</b>      | 0.13    | 0.00    | -0.05 | 0.17 | 0.16  | 0.60  | 1.00  |       |       |      |      |      |      |      |      |       |       |       |      |      |  |
| <b>PP</b>      | 0.10    | 0.00    | -0.08 | 0.17 | 0.18  | 0.82  | 0.49  | 1.00  |       |      |      |      |      |      |      |       |       |       |      |      |  |
| <b>BP</b>      | 0.10    | 0.00    | -0.03 | 0.23 | 0.17  | 0.57  | 0.72  | 0.48  | 1.00  |      |      |      |      |      |      |       |       |       |      |      |  |
| <b>MEP</b>     | 0.17    | 0.07    | 0.09  | 0.20 | 0.23  | 0.26  | 0.15  | 0.28  | 0.21  | 1.00 |      |      |      |      |      |       |       |       |      |      |  |
| <b>MBP</b>     | 0.05    | 0.09    | 0.14  | 0.12 | -0.03 | -0.01 | 0.06  | 0.00  | 0.05  | 0.13 | 1.00 |      |      |      |      |       |       |       |      |      |  |
| <b>MiBP</b>    | -0.03   | 0.04    | 0.15  | 0.06 | -0.05 | 0.03  | 0.00  | 0.01  | -0.01 | 0.04 | 0.37 | 1.00 |      |      |      |       |       |       |      |      |  |
| <b>MCPP</b>    | 0.07    | 0.08    | 0.26  | 0.04 | -0.05 | 0.01  | 0.01  | 0.00  | -0.02 | 0.04 | 0.62 | 0.24 | 1.00 |      |      |       |       |       |      |      |  |
| <b>MBzP</b>    | -0.02   | -0.01   | 0.22  | 0.09 | -0.04 | -0.01 | -0.01 | 0.00  | -0.05 | 0.11 | 0.42 | 0.38 | 0.28 | 1.00 |      |       |       |       |      |      |  |
| <b>MEHP</b>    | 0.06    | 0.08    | 0.27  | 0.04 | 0.00  | -0.02 | -0.01 | -0.03 | -0.02 | 0.10 | 0.23 | 0.28 | 0.25 | 0.30 | 1.00 |       |       |       |      |      |  |
| <b>MEOHP</b>   | 0.08    | 0.09    | 0.28  | 0.03 | -0.01 | -0.05 | -0.03 | -0.09 | -0.05 | 0.09 | 0.32 | 0.30 | 0.34 | 0.38 | 0.84 | 1.00  |       |       |      |      |  |
| <b>MEHHP</b>   | 0.08    | 0.10    | 0.28  | 0.03 | -0.01 | -0.05 | -0.02 | -0.09 | -0.04 | 0.08 | 0.30 | 0.29 | 0.34 | 0.35 | 0.83 | 0.98  | 1.00  |       |      |      |  |
| <b>MECPP</b>   | 0.09    | 0.09    | 0.24  | 0.00 | -0.03 | -0.07 | -0.05 | -0.10 | -0.08 | 0.04 | 0.26 | 0.26 | 0.30 | 0.32 | 0.78 | 0.92  | 0.91  | 1.00  |      |      |  |
| <b>MCOP</b>    | 0.08    | 0.02    | 0.24  | 0.05 | 0.03  | 0.01  | -0.02 | 0.01  | -0.02 | 0.07 | 0.14 | 0.19 | 0.28 | 0.20 | 0.28 | 0.34  | 0.34  | 0.38  | 1.00 |      |  |
| <b>MCNP</b>    | 0.14    | 0.06    | 0.20  | 0.01 | 0.04  | 0.03  | 0.02  | 0.04  | 0.00  | 0.02 | 0.15 | 0.12 | 0.34 | 0.17 | 0.19 | 0.26  | 0.26  | 0.27  | 0.42 | 1.00 |  |

Abbreviations: BP: butylparaben, BPA: bisphenol A, BP3: benzophenone-3, DCP: dichlorophenol, EP: ethylparaben, MBP: mono-n-butyl phthalate, MBzP: monobenzyl phthalate, MCNP: monocarboxy-isononyl phthalate, MCOP: monocarboxy-isoocetyl phthalate, MCPP: mono(3-carboxypropyl) phthalate, MECPP: mono(2-ethyl-5-carboxypentyl) phthalate, MEHHP: mono(2-ethyl-5-hydroxyhexyl) phthalate, MEHP: mono(2-ethylhexyl) phthalate, MEOHP: mono(2-ethyl-5-oxohexyl) phthalate, MEP: monoethyl phthalate, MiBP: mono-isobutyl phthalate, MP: methylparaben, PP: propylparaben, TCS: triclosan.

<sup>a</sup> Includes boys that had SDQ scores at 3 years and/or at 5 years

Table S5: Adjusted associations between phenols, phthalate metabolites and behavior at 3 years among boys of the EDEN mother-child cohort (N = 518 to 520 mother-son pairs, depending of the subscale). Analysis simultaneously adjusted for all phenols and phthalate metabolites assessed in our study population

|                   | Emotional symptoms |              | Conduct problems |              | Peer relationship problems |              | Hyperactivity - inattention problems |              | Prosocial behavior |              | External behavior |              | Internal behavior |              |
|-------------------|--------------------|--------------|------------------|--------------|----------------------------|--------------|--------------------------------------|--------------|--------------------|--------------|-------------------|--------------|-------------------|--------------|
|                   | IRR                | 95% CI       | IRR              | 95% CI       | IRR                        | 95% CI       | IRR                                  | 95% CI       | IRR                | 95% CI       | IRR               | 95% CI       | IRR               | 95% CI       |
| <b>Phenols</b>    |                    |              |                  |              |                            |              |                                      |              |                    |              |                   |              |                   |              |
| ∑Dichlorophenols  | 1.02               | [0.98; 1.06] | 1.02             | [0.99; 1.04] | 0.99                       | [0.95; 1.03] | 1.00                                 | [0.98; 1.03] | 1.01               | [0.98; 1.04] | 1.01              | [0.99; 1.03] | 1.01              | [0.98; 1.04] |
| Bisphenol A       | 1.01               | [0.93; 1.09] | 1.04             | [0.99; 1.09] | 1.11                       | [1.03; 1.20] | 1.06                                 | [1.01; 1.11] | 1.06               | [1.01; 1.13] | 1.05              | [1.00; 1.09] | 1.05              | [0.99; 1.12] |
| Benzophenone-3    | 0.99               | [0.96; 1.03] | 0.99             | [0.97; 1.01] | 1.01                       | [0.98; 1.05] | 1.01                                 | [0.99; 1.04] | 0.99               | [0.96; 1.02] | 1.00              | [0.98; 1.02] | 1.00              | [0.97; 1.03] |
| Triclosan         | 1.02               | [0.99; 1.04] | 1.01             | [1.00; 1.03] | 1.01                       | [0.99; 1.04] | 1.01                                 | [1.00; 1.03] | 1.01               | [0.99; 1.03] | 1.01              | [1.00; 1.03] | 1.01              | [1.00; 1.03] |
| ∑Parabens         | 1.00               | [0.96; 1.04] | 0.99             | [0.97; 1.02] | 0.99                       | [0.95; 1.03] | 0.98                                 | [0.95; 1.00] | 0.97               | [0.94; 1.00] | 0.98              | [0.96; 1.01] | 1.00              | [0.97; 1.03] |
| <b>Phthalates</b> |                    |              |                  |              |                            |              |                                      |              |                    |              |                   |              |                   |              |
| MEP               | 1.01               | [0.95; 1.07] | 1.00             | [0.96; 1.03] | 0.96                       | [0.90; 1.01] | 1.00                                 | [0.96; 1.03] | 0.99               | [0.95; 1.03] | 0.99              | [0.96; 1.03] | 0.98              | [0.94; 1.03] |
| MBP               | 1.09               | [1.00; 1.18] | 1.04             | [0.98; 1.09] | 1.06                       | [0.97; 1.15] | 1.03                                 | [0.97; 1.08] | 1.04               | [0.98; 1.10] | 1.03              | [0.99; 1.08] | 1.07              | [1.01; 1.14] |
| MiBP              | 0.94               | [0.86; 1.02] | 1.00             | [0.95; 1.05] | 1.01                       | [0.93; 1.09] | 0.96                                 | [0.91; 1.01] | 1.01               | [0.95; 1.07] | 0.98              | [0.94; 1.02] | 0.97              | [0.91; 1.04] |
| MCPP              | 0.95               | [0.85; 1.06] | 0.94             | [0.88; 1.01] | 0.98                       | [0.88; 1.10] | 0.95                                 | [0.89; 1.02] | 0.92               | [0.85; 1.00] | 0.95              | [0.90; 1.01] | 0.97              | [0.89; 1.05] |
| MBzP              | 1.02               | [0.95; 1.09] | 1.00             | [0.96; 1.05] | 1.04                       | [0.97; 1.11] | 0.99                                 | [0.95; 1.03] | 0.97               | [0.92; 1.02] | 1.00              | [0.96; 1.03] | 1.03              | [0.98; 1.09] |
| MCOP              | 1.02               | [0.94; 1.11] | 1.03             | [0.98; 1.09] | 0.96                       | [0.88; 1.04] | 1.00                                 | [0.95; 1.05] | 1.02               | [0.96; 1.08] | 1.02              | [0.97; 1.06] | 0.99              | [0.93; 1.06] |
| MCNP              | 1.00               | [0.93; 1.08] | 0.99             | [0.94; 1.03] | 0.99                       | [0.92; 1.06] | 0.98                                 | [0.94; 1.03] | 0.99               | [0.94; 1.05] | 0.98              | [0.95; 1.02] | 1.00              | [0.94; 1.05] |
| ∑DEHP             | 1.02               | [0.94; 1.10] | 0.98             | [0.93; 1.03] | 1.02                       | [0.94; 1.11] | 0.98                                 | [0.93; 1.03] | 0.99               | [0.93; 1.05] | 0.97              | [0.93; 1.02] | 1.02              | [0.96; 1.09] |

Associations adjusted for recruitment center, maternal age, parity, parental education, breastfeeding duration, household income, smoking during pregnancy, maternal psychological difficulties during pregnancy and child age at assessment.

Abbreviations: ∑DEHP: molecular sum of di(2-ethylhexyl) phthalate metabolites, CI: confidence interval, OR: odds ratio, MBP: mono-n-butyl phthalate, MBzP: monobenzyl phthalate, MCNP: monocarboxy-isononyl phthalate, MCOP: monocarboxy-isoocetyl phthalate, MCP: mono(3-carboxypropyl) phthalate, MEP: monoethyl phthalate, MiBP: mono-isobutyl phthalate, ∑dichlorophenols: molecular sum of 2,4 and 2,5-dichlorophenols, ∑Parabens : molecular sum of methyl, ethyl, propyl and butyl parabens.

Table S6: Adjusted associations between phenols, phthalate metabolites and behavior at 5 years among boys of the EDEN mother-child cohort (N = 457 to 458 mother-son pairs, depending of the subscale). Analysis simultaneously adjusted for all phenols and phthalate metabolites assessed in our study population

|                   | Emotional symptoms |              | Conduct problems |              | Peer relationship problems |              | Hyperactivity - inattention problems |              | Prosocial behavior |              | External behavior |              | Internal behavior |              |
|-------------------|--------------------|--------------|------------------|--------------|----------------------------|--------------|--------------------------------------|--------------|--------------------|--------------|-------------------|--------------|-------------------|--------------|
|                   | IRR                | 95% CI       | IRR              | 95% CI       | IRR                        | 95% CI       | IRR                                  | 95% CI       | IRR                | 95% CI       | IRR               | 95% CI       | IRR               | 95% CI       |
| <b>Phenols</b>    |                    |              |                  |              |                            |              |                                      |              |                    |              |                   |              |                   |              |
| ∑Dichlorophenols  | 1.01               | [0.97; 1.05] | 1.03             | [1.00; 1.07] | 0.98                       | [0.94; 1.03] | 1.01                                 | [0.98; 1.04] | 1.00               | [0.96; 1.05] | 1.02              | [0.99; 1.05] | 1.00              | [0.97; 1.03] |
| Bisphenol A       | 1.03               | [0.95; 1.12] | 1.02             | [0.95; 1.10] | 1.01                       | [0.92; 1.12] | 1.08                                 | [1.02; 1.15] | 1.07               | [0.98; 1.17] | 1.06              | [1.00; 1.12] | 1.03              | [0.95; 1.10] |
| Benzophenone-3    | 0.96               | [0.92; 0.99] | 1.00             | [0.97; 1.03] | 1.02                       | [0.98; 1.07] | 1.02                                 | [0.99; 1.05] | 1.02               | [0.98; 1.06] | 1.01              | [0.99; 1.04] | 0.98              | [0.95; 1.01] |
| Triclosan         | 1.01               | [0.99; 1.04] | 1.00             | [0.98; 1.02] | 1.01                       | [0.98; 1.04] | 1.00                                 | [0.98; 1.02] | 1.00               | [0.97; 1.03] | 1.00              | [0.98; 1.02] | 1.01              | [0.99; 1.03] |
| ∑Parabens         | 0.99               | [0.95; 1.03] | 0.99             | [0.95; 1.02] | 0.99                       | [0.94; 1.04] | 0.97                                 | [0.94; 1.01] | 0.99               | [0.94; 1.04] | 0.98              | [0.95; 1.01] | 0.99              | [0.96; 1.03] |
| <b>Phthalates</b> |                    |              |                  |              |                            |              |                                      |              |                    |              |                   |              |                   |              |
| MEP               | 1.01               | [0.95; 1.07] | 1.04             | [0.98; 1.09] | 0.98                       | [0.91; 1.05] | 0.99                                 | [0.95; 1.04] | 0.96               | [0.90; 1.03] | 1.01              | [0.97; 1.06] | 0.99              | [0.94; 1.04] |
| MBP               | 1.03               | [0.95; 1.12] | 1.00             | [0.93; 1.08] | 1.05                       | [0.95; 1.16] | 1.02                                 | [0.95; 1.09] | 1.03               | [0.94; 1.14] | 1.01              | [0.95; 1.08] | 1.04              | [0.96; 1.12] |
| MiBP              | 0.95               | [0.88; 1.04] | 1.02             | [0.95; 1.10] | 0.99                       | [0.89; 1.09] | 0.95                                 | [0.90; 1.02] | 1.06               | [0.97; 1.17] | 0.98              | [0.93; 1.04] | 0.97              | [0.90; 1.04] |
| MCPP              | 0.93               | [0.83; 1.03] | 1.05             | [0.95; 1.16] | 1.02                       | [0.89; 1.17] | 0.99                                 | [0.91; 1.08] | 0.97               | [0.86; 1.10] | 1.01              | [0.93; 1.09] | 0.96              | [0.87; 1.06] |
| MBzP              | 1.04               | [0.97; 1.11] | 0.98             | [0.92; 1.04] | 1.00                       | [0.92; 1.08] | 1.00                                 | [0.95; 1.05] | 0.96               | [0.89; 1.04] | 0.99              | [0.94; 1.04] | 1.02              | [0.96; 1.08] |
| MCOP              | 1.05               | [0.97; 1.14] | 1.00             | [0.93; 1.08] | 0.96                       | [0.86; 1.06] | 1.02                                 | [0.95; 1.08] | 0.94               | [0.85; 1.03] | 1.01              | [0.95; 1.07] | 1.02              | [0.94; 1.09] |
| MCNP              | 1.03               | [0.96; 1.11] | 0.97             | [0.91; 1.03] | 1.04                       | [0.95; 1.13] | 0.97                                 | [0.92; 1.03] | 1.01               | [0.93; 1.09] | 0.97              | [0.92; 1.02] | 1.04              | [0.97; 1.10] |
| ∑DEHP             | 0.98               | [0.91; 1.06] | 0.97             | [0.90; 1.05] | 1.02                       | [0.92; 1.12] | 1.01                                 | [0.95; 1.07] | 0.98               | [0.90; 1.07] | 0.99              | [0.94; 1.06] | 0.99              | [0.92; 1.07] |

Associations adjusted for recruitment center, maternal age, parity, parental education, breastfeeding duration, household income, smoking during pregnancy, maternal psychological difficulties during pregnancy and child age at assessment.

Abbreviations: ∑DEHP: molecular sum of di(2-ethylhexyl) phthalate metabolites, CI: confidence interval, OR: odds ratio, MBP: mono-n-butyl phthalate, MBzP: monobenzyl phthalate, MCNP: monocarboxy-isononyl phthalate, MCOP: monocarboxy-isoocetyl phthalate, MCPP: mono(3-carboxypropyl) phthalate, MEP: monoethyl phthalate, MiBP: mono-isobutyl phthalate, ∑dichlorophenols : molecular sum of 2,4 and 2,5-dichlorophenols, ∑Parabens : molecular sum of methyl, ethyl, propyl and butyl parabens.



Table S7: Associations between phenols, phthalate metabolites and behavior at 3 years corrected for exposure measurement error using the a posteriori disattenuation method (N = 518 to 520 mother-son pairs, depending of the subscale)

|                   | Emotional symptoms |              | Conduct problems |              | Peer relationship problems |              | Hyperactivity - inattention problems |              | Prosocial behavior |              | Externalizing behavior |              | Internalizing behavior |              |
|-------------------|--------------------|--------------|------------------|--------------|----------------------------|--------------|--------------------------------------|--------------|--------------------|--------------|------------------------|--------------|------------------------|--------------|
|                   | IRR                | 95% CI       | IRR              | 95% CI       | IRR                        | 95% CI       | IRR                                  | 95% CI       | IRR                | 95% CI       | IRR                    | 95% CI       | IRR                    | 95% CI       |
| <b>Phenols</b>    |                    |              |                  |              |                            |              |                                      |              |                    |              |                        |              |                        |              |
| ∑Dichlorophenols  | 1.03               | [0.96; 1.09] | 1.02             | [0.98; 1.06] | 0.98                       | [0.92; 1.05] | 1.00                                 | [0.97; 1.04] | 1.01               | [0.96; 1.05] | 1.01                   | [0.98; 1.05] | 1.01                   | [0.96; 1.06] |
| Bisphenol A       | 1.06               | [0.72; 1.54] | 1.15             | [0.90; 1.46] | 1.69                       | [1.16; 2.46] | 1.19                                 | [0.95; 1.50] | 1.25               | [0.95; 1.65] | 1.17                   | [0.95; 1.43] | 1.32                   | [0.98; 1.77] |
| Benzophenone-3    | 0.99               | [0.94; 1.05] | 0.99             | [0.95; 1.02] | 1.02                       | [0.96; 1.08] | 1.02                                 | [0.99; 1.06] | 0.98               | [0.94; 1.02] | 1.01                   | [0.97; 1.04] | 1.00                   | [0.96; 1.05] |
| Triclosan         | 1.03               | [0.99; 1.07] | 1.02             | [1.00; 1.05] | 1.01                       | [0.97; 1.05] | 1.02                                 | [1.00; 1.04] | 1.01               | [0.99; 1.04] | 1.02                   | [1.00; 1.04] | 1.02                   | [0.99; 1.05] |
| ∑Parabens         | 1.01               | [0.94; 1.07] | 0.99             | [0.95; 1.03] | 0.98                       | [0.92; 1.04] | 0.97                                 | [0.93; 1.01] | 0.95               | [0.91; 1.00] | 0.98                   | [0.95; 1.01] | 0.99                   | [0.94; 1.04] |
| <b>Phthalates</b> |                    |              |                  |              |                            |              |                                      |              |                    |              |                        |              |                        |              |
| MEP               | 1.07               | [0.94; 1.22] | 1.01             | [0.93; 1.10] | 0.94                       | [0.82; 1.07] | 1.00                                 | [0.92; 1.09] | 0.97               | [0.88; 1.08] | 1.01                   | [0.93; 1.08] | 1.00                   | [0.90; 1.11] |
| MBP               | 1.15               | [1.00; 1.32] | 1.01             | [0.93; 1.11] | 1.16                       | [1.01; 1.33] | 0.96                                 | [0.88; 1.05] | 0.97               | [0.87; 1.07] | 0.99                   | [0.92; 1.07] | 1.15                   | [1.04; 1.29] |
| MiBP              | 0.93               | [0.78; 1.13] | 1.00             | [0.89; 1.12] | 1.13                       | [0.95; 1.36] | 0.89                                 | [0.80; 0.99] | 0.98               | [0.86; 1.12] | 0.94                   | [0.85; 1.04] | 1.03                   | [0.89; 1.19] |
| MCPP              | 1.16               | [0.81; 1.68] | 0.91             | [0.72; 1.14] | 1.24                       | [0.86; 1.78] | 0.81                                 | [0.65; 1.02] | 0.78               | [0.60; 1.02] | 0.86                   | [0.70; 1.05] | 1.19                   | [0.89; 1.58] |
| MBzP              | 1.06               | [0.91; 1.24] | 1.01             | [0.92; 1.11] | 1.18                       | [1.01; 1.36] | 0.94                                 | [0.86; 1.03] | 0.94               | [0.84; 1.05] | 0.97                   | [0.90; 1.06] | 1.11                   | [0.99; 1.25] |
| MCOP              | 1.08               | [0.85; 1.37] | 1.05             | [0.91; 1.22] | 0.97                       | [0.76; 1.23] | 0.94                                 | [0.81; 1.09] | 0.99               | [0.83; 1.17] | 0.99                   | [0.88; 1.13] | 1.02                   | [0.85; 1.23] |
| MCNP              | 1.09               | [0.59; 2.00] | 0.90             | [0.62; 1.33] | 0.96                       | [0.51; 1.78] | 0.74                                 | [0.50; 1.08] | 0.83               | [0.53; 1.31] | 0.82                   | [0.58; 1.14] | 1.02                   | [0.63; 1.65] |
| ∑DEHP             | 1.20               | [0.84; 1.70] | 0.97             | [0.77; 1.21] | 1.27                       | [0.90; 1.80] | 0.86                                 | [0.69; 1.07] | 0.96               | [0.75; 1.24] | 0.90                   | [0.75; 1.10] | 1.23                   | [0.93; 1.62] |

Associations adjusted for recruitment center, maternal age, parity, parental education, breastfeeding duration, household income, smoking during pregnancy, maternal psychological difficulties during pregnancy and child age at assessment.

Abbreviations: ∑DEHP: molecular sum of di(2-ethylhexyl) phthalate metabolites, CI: confidence interval, OR: odds ratio, MBP: mono-n-butyl phthalate, MBzP: monobenzyl phthalate, MCNP: monocarboxy-isononyl phthalate, MCOP: monocarboxy-isoocetyl phthalate, MCP: mono(3-carboxypropyl) phthalate, MEP: monoethyl phthalate, MiBP: mono-isobutyl phthalate, ∑dichlorophenols: molecular sum of 2,4 and 2,5-dichlorophenols, ∑Parabens : molecular sum of methyl, ethyl, propyl and butyl parabens.

Table S8: Associations between phenols, phthalate metabolites and behavior at 5 years corrected for exposure measurement error using the a posteriori disattenuation method (N = 457 to 458 mother-son pairs, depending of the subscale)

|                   | Emotional symptoms |              | Conduct problems |              | Peer relationship problems |              | Hyperactivity - inattention problems |              | Prosocial behavior |              | Externalizing behavior |              | Internalizing behavior |              |
|-------------------|--------------------|--------------|------------------|--------------|----------------------------|--------------|--------------------------------------|--------------|--------------------|--------------|------------------------|--------------|------------------------|--------------|
|                   | IRR                | 95% CI       | IRR              | 95% CI       | IRR                        | 95% CI       | IRR                                  | 95% CI       | IRR                | 95% CI       | IRR                    | 95% CI       | IRR                    | 95% CI       |
| <b>Phenols</b>    |                    |              |                  |              |                            |              |                                      |              |                    |              |                        |              |                        |              |
| ∑Dichlorophenols  | 1.01               | [0.95; 1.07] | 1.06             | [1.00; 1.12] | 0.98                       | [0.91; 1.06] | 1.01                                 | [0.97; 1.06] | 1.00               | [0.94; 1.08] | 1.03                   | [0.99; 1.08] | 1.00                   | [0.94; 1.05] |
| Bisphenol A       | 1.16               | [0.79; 1.69] | 1.11             | [0.78; 1.58] | 1.13                       | [0.70; 1.82] | 1.44                                 | [1.07; 1.94] | 1.26               | [0.82; 1.94] | 1.30                   | [0.98; 1.72] | 1.15                   | [0.82; 1.61] |
| Benzophenone-3    | 0.94               | [0.88; 0.99] | 1.01             | [0.95; 1.06] | 1.02                       | [0.95; 1.10] | 1.03                                 | [0.98; 1.08] | 1.03               | [0.96; 1.10] | 1.02                   | [0.98; 1.06] | 0.97                   | [0.92; 1.02] |
| Triclosan         | 1.02               | [0.98; 1.06] | 1.00             | [0.97; 1.04] | 1.01                       | [0.97; 1.06] | 0.99                                 | [0.96; 1.02] | 0.99               | [0.95; 1.03] | 1.00                   | [0.97; 1.03] | 1.02                   | [0.98; 1.05] |
| ∑Parabens         | 0.98               | [0.92; 1.04] | 0.99             | [0.94; 1.05] | 0.98                       | [0.91; 1.06] | 0.96                                 | [0.91; 1.01] | 0.98               | [0.91; 1.05] | 0.97                   | [0.93; 1.02] | 0.98                   | [0.93; 1.04] |
| <b>Phthalates</b> |                    |              |                  |              |                            |              |                                      |              |                    |              |                        |              |                        |              |
| MEP               | 1.01               | [0.89; 1.16] | 1.08             | [0.96; 1.22] | 0.97                       | [0.82; 1.14] | 0.98                                 | [0.88; 1.09] | 0.91               | [0.78; 1.06] | 1.02                   | [0.93; 1.13] | 0.99                   | [0.88; 1.11] |
| MBP               | 0.99               | [0.86; 1.13] | 1.06             | [0.93; 1.19] | 1.14                       | [0.97; 1.35] | 1.02                                 | [0.92; 1.14] | 1.02               | [0.88; 1.20] | 1.04                   | [0.94; 1.14] | 1.04                   | [0.92; 1.18] |
| MiBP              | 0.94               | [0.78; 1.13] | 1.02             | [0.87; 1.21] | 1.00                       | [0.80; 1.25] | 0.92                                 | [0.80; 1.06] | 1.10               | [0.90; 1.35] | 0.96                   | [0.84; 1.10] | 0.96                   | [0.81; 1.13] |
| MCPP              | 0.90               | [0.63; 1.30] | 1.21             | [0.87; 1.67] | 1.37                       | [0.88; 2.12] | 1.04                                 | [0.78; 1.38] | 0.96               | [0.64; 1.44] | 1.10                   | [0.84; 1.44] | 1.06                   | [0.76; 1.46] |
| MBzP              | 1.07               | [0.92; 1.24] | 0.96             | [0.84; 1.10] | 1.03                       | [0.86; 1.24] | 0.99                                 | [0.88; 1.12] | 0.95               | [0.80; 1.11] | 0.97                   | [0.87; 1.09] | 1.06                   | [0.92; 1.21] |
| MCOP              | 1.15               | [0.91; 1.45] | 0.99             | [0.80; 1.22] | 0.98                       | [0.73; 1.30] | 1.05                                 | [0.88; 1.26] | 0.83               | [0.63; 1.08] | 1.02                   | [0.86; 1.22] | 1.08                   | [0.88; 1.33] |
| MCNP              | 1.44               | [0.78; 2.64] | 0.86             | [0.49; 1.52] | 1.40                       | [0.67; 2.91] | 0.87                                 | [0.53; 1.42] | 0.83               | [0.42; 1.65] | 0.87                   | [0.55; 1.38] | 1.44                   | [0.84; 2.45] |
| ∑DEHP             | 1.04               | [0.74; 1.48] | 0.95             | [0.68; 1.31] | 1.14                       | [0.74; 1.76] | 1.07                                 | [0.82; 1.41] | 0.87               | [0.59; 1.28] | 1.02                   | [0.79; 1.33] | 1.08                   | [0.79; 1.47] |

Associations adjusted for recruitment center, maternal age, parity, parental education, breastfeeding duration, household income, smoking during pregnancy, maternal psychological difficulties during pregnancy and child age at assessment.

Abbreviations: ∑DEHP: molecular sum of di(2-ethylhexyl) phthalate metabolites, CI: confidence interval, OR: odds ratio, MBP: mono-n-butyl phthalate, MBzP: monobenzyl phthalate, MCNP: monocarboxy-isononyl phthalate, MCOP: monocarboxy-isoocetyl phthalate, MCP: mono(3-carboxypropyl) phthalate, MEP: monoethyl phthalate, MiBP: mono-isobutyl phthalate, ∑dichlorophenols : molecular sum of 2,4 and 2,5-dichlorophenols, ∑Parabens : molecular sum of methyl, ethyl, propyl and butyl parabens.

Table S9: Associations between phenols, phthalate metabolites and dichotomized SDQ scores at 3 years corrected for exposure measurement error using the a posteriori disattenuation method (N = 518 to 520 mother-son pairs, depending of the subscale)

|                   | Emotional symptoms |              | Conduct problems |              | Peer relationship problems |              | Hyperactivity / inattention problems |              | Prosocial behavior |              | Externalizing behavior |              | Internalizing behavior |              |
|-------------------|--------------------|--------------|------------------|--------------|----------------------------|--------------|--------------------------------------|--------------|--------------------|--------------|------------------------|--------------|------------------------|--------------|
|                   | OR                 | 95% CI       | OR               | 95% CI       | OR                         | 95% CI       | OR                                   | 95% CI       | OR                 | 95% CI       | OR                     | 95% CI       | OR                     | 95% CI       |
| <b>Phenols</b>    |                    |              |                  |              |                            |              |                                      |              |                    |              |                        |              |                        |              |
| ∑Dichlorophenols  | 1.10               | [0.89; 1.35] | 0.95             | [0.74; 1.23] | 0.98                       | [0.77; 1.24] | 1.07                                 | [0.87; 1.32] | 1.04               | [0.84; 1.29] | 1.08                   | [0.89; 1.32] | 1.08                   | [0.88; 1.31] |
| Bisphenol A       | 0.65               | [0.17; 2.42] | 1.45             | [0.35; 6.00] | 5.44                       | [1.41; 21.0] | 1.39                                 | [0.39; 4.93] | 1.39               | [0.37; 5.18] | 1.05                   | [0.31; 3.55] | 2.71                   | [0.83; 8.87] |
| Benzophenone-3    | 1.00               | [0.82; 1.22] | 1.03             | [0.83; 1.28] | 1.05                       | [0.85; 1.30] | 1.01                                 | [0.83; 1.23] | 0.96               | [0.78; 1.18] | 0.96                   | [0.80; 1.17] | 1.03                   | [0.86; 1.24] |
| Triclosan         | 1.13               | [0.98; 1.30] | 1.18             | [1.01; 1.38] | 1.10                       | [0.95; 1.28] | 1.03                                 | [0.90; 1.18] | 1.13               | [0.98; 1.30] | 1.08                   | [0.95; 1.23] | 1.09                   | [0.95; 1.24] |
| Parabens          | 1.01               | [0.82; 1.26] | 1.00             | [0.79; 1.27] | 0.95                       | [0.76; 1.20] | 1.02                                 | [0.82; 1.26] | 0.87               | [0.69; 1.09] | 0.90                   | [0.73; 1.11] | 1.06                   | [0.86; 1.29] |
| <b>Phthalates</b> |                    |              |                  |              |                            |              |                                      |              |                    |              |                        |              |                        |              |
| MEP               | 1.38               | [0.88; 2.15] | 0.88             | [0.53; 1.48] | 1.11                       | [0.68; 1.80] | 1.19                                 | [0.75; 1.88] | 0.95               | [0.59; 1.54] | 1.01                   | [0.65; 1.56] | 0.95                   | [0.62; 1.47] |
| MBP               | 1.25               | [0.79; 1.98] | 0.98             | [0.58; 1.66] | 1.45                       | [0.89; 2.37] | 0.89                                 | [0.55; 1.45] | 0.80               | [0.48; 1.34] | 0.84                   | [0.53; 1.34] | 1.64                   | [1.08; 2.50] |
| MiBP              | 0.71               | [0.39; 1.32] | 1.36             | [0.68; 2.70] | 1.46                       | [0.74; 2.89] | 0.79                                 | [0.43; 1.44] | 1.28               | [0.67; 2.44] | 0.83                   | [0.47; 1.49] | 1.25                   | [0.70; 2.24] |
| MCPP              | 1.12               | [0.32; 3.92] | 0.31             | [0.07; 1.39] | 1.82                       | [0.48; 6.90] | 0.32                                 | [0.08; 1.20] | 0.33               | [0.08; 1.32] | 0.37                   | [0.10; 1.29] | 2.48                   | [0.78; 7.89] |
| MBzP              | 0.97               | [0.58; 1.63] | 0.97             | [0.54; 1.74] | 1.75                       | [1.01; 3.04] | 0.85                                 | [0.51; 1.41] | 0.86               | [0.50; 1.47] | 0.87                   | [0.53; 1.41] | 1.55                   | [0.96; 2.49] |
| MCOP              | 1.08               | [0.49; 2.38] | 1.57             | [0.68; 3.61] | 1.12                       | [0.46; 2.73] | 0.59                                 | [0.25; 1.35] | 0.93               | [0.42; 2.10] | 1.27                   | [0.61; 2.66] | 1.30                   | [0.62; 2.71] |
| MCNP              | 0.36               | [0.04; 3.65] | 0.98             | [0.09; 11.1] | 2.35                       | [0.26; 21.5] | 0.04                                 | [0.00; 0.51] | 0.18               | [0.01; 2.19] | 0.20                   | [0.02; 1.93] | 0.98                   | [0.13; 7.66] |
| ∑DEHP             | 3.28               | [1.03; 10.4] | 1.62             | [0.44; 6.02] | 1.52                       | [0.41; 5.64] | 1.15                                 | [0.35; 3.77] | 2.33               | [0.71; 7.61] | 1.39                   | [0.46; 4.25] | 5.53                   | [1.83; 16.8] |

Abbreviations: ∑DEHP: molecular sum of di(2-ethylhexyl) phthalate metabolites, CI: confidence interval, OR: odds ratio, MBP: mono-n-butyl phthalate, MBzP: monobenzyl phthalate, MCNP: monocarboxy-isononyl phthalate, MCOP: monocarboxy-isoocetyl phthalate, MCPP: mono(3-carboxypropyl) phthalate, MEP: monoethyl phthalate, MiBP: mono-isobutyl phthalate, ∑dichlorophenols : molecular sum of 2,4 and 2,5-dichlorophenols, ∑Parabens : molecular sum of methyl, ethyl, propyl and butyl parabens.

Table S10: Associations between phenols, phthalate metabolites and dichotomized SDQ scores at 5 years corrected for exposure measurement error using the a posteriori disattenuation method (N = 518 to 520 mother-son pairs, depending of the subscale)

|                   | Emotional symptoms |              | Conduct problems |              | Peer relationship problems |              | Hyperactivity / inattention problems |               | Prosocial behavior |              | Externalizing behavior |              | Internalizing behavior |              |
|-------------------|--------------------|--------------|------------------|--------------|----------------------------|--------------|--------------------------------------|---------------|--------------------|--------------|------------------------|--------------|------------------------|--------------|
|                   | OR                 | 95% CI       | OR               | 95% CI       | OR                         | 95% CI       | OR                                   | 95% CI        | OR                 | 95% CI       | OR                     | 95% CI       | OR                     | 95% CI       |
| <b>Phenols</b>    |                    |              |                  |              |                            |              |                                      |               |                    |              |                        |              |                        |              |
| ∑Dichlorophenols  | 0.98               | [0.79; 1.21] | 0.90             | [0.69; 1.16] | 0.90                       | [0.68; 1.19] | 1.17                                 | [0.95; 1.43]  | 1.02               | [0.80; 1.31] | 1.08                   | [0.88; 1.32] | 0.91                   | [0.73; 1.13] |
| Bisphenol A       | 1.23               | [0.33; 4.59] | 1.21             | [0.26; 5.65] | 1.61                       | [0.34; 7.66] | 5.39                                 | [1.45; 20.0]  | 1.53               | [0.34; 6.91] | 2.46                   | [0.69; 8.77] | 1.02                   | [0.28; 3.68] |
| Benzophenone-3    | 0.88               | [0.71; 1.09] | 1.01             | [0.80; 1.27] | 0.98                       | [0.77; 1.25] | 1.09                                 | [0.89; 1.33]  | 1.08               | [0.85; 1.36] | 1.10                   | [0.91; 1.33] | 0.94                   | [0.77; 1.15] |
| Triclosan         | 1.15               | [0.99; 1.32] | 1.10             | [0.94; 1.29] | 1.17                       | [0.99; 1.39] | 1.01                                 | [0.88; 1.16]  | 0.99               | [0.85; 1.16] | 1.00                   | [0.88; 1.15] | 1.11                   | [0.97; 1.28] |
| Parabens          | 0.92               | [0.74; 1.14] | 0.93             | [0.72; 1.20] | 1.02                       | [0.80; 1.32] | 0.97                                 | [0.77; 1.21]  | 0.96               | [0.74; 1.23] | 1.01                   | [0.82; 1.25] | 0.93                   | [0.76; 1.14] |
| <b>Phthalates</b> |                    |              |                  |              |                            |              |                                      |               |                    |              |                        |              |                        |              |
| mEP               | 1.46               | [0.93; 2.30] | 1.35             | [0.81; 2.26] | 1.04                       | [0.60; 1.80] | 1.14                                 | [0.71; 1.83]  | 0.56               | [0.31; 0.99] | 1.22                   | [0.79; 1.90] | 0.84                   | [0.53; 1.32] |
| mBP               | 1.06               | [0.67; 1.68] | 1.16             | [0.67; 1.98] | 1.71                       | [1.04; 2.83] | 1.08                                 | [0.67; 1.75]  | 0.70               | [0.38; 1.28] | 1.10                   | [0.69; 1.76] | 1.38                   | [0.90; 2.11] |
| miBP              | 1.03               | [0.56; 1.89] | 1.05             | [0.52; 2.11] | 1.14                       | [0.55; 2.38] | 0.89                                 | [0.47; 1.67]  | 1.05               | [0.50; 2.24] | 1.01                   | [0.56; 1.83] | 0.92                   | [0.51; 1.67] |
| mCPP              | 1.05               | [0.31; 3.62] | 1.43             | [0.34; 5.99] | 2.45                       | [0.61; 9.79] | 0.89                                 | [0.24; 3.29]  | 0.47               | [0.10; 2.15] | 1.22                   | [0.36; 4.20] | 2.11                   | [0.67; 6.70] |
| mBzP              | 1.15               | [0.70; 1.89] | 1.06             | [0.59; 1.88] | 0.89                       | [0.48; 1.65] | 1.04                                 | [0.62; 1.75]  | 0.56               | [0.29; 1.08] | 0.80                   | [0.49; 1.31] | 1.10                   | [0.68; 1.78] |
| mCOP              | 1.59               | [0.74; 3.45] | 0.78             | [0.30; 2.01] | 1.10                       | [0.44; 2.79] | 2.00                                 | [0.90; 4.44]  | 0.66               | [0.25; 1.70] | 1.11                   | [0.51; 2.41] | 1.34                   | [0.64; 2.83] |
| mCNP              | 1.08               | [0.12; 9.47] | 0.34             | [0.02; 5.26] | 0.88                       | [0.06; 12.0] | 1.25                                 | [0.13; 12.04] | 1.84               | [0.17; 20.0] | 0.96                   | [0.11; 8.50] | 1.41                   | [0.18; 10.8] |
| ∑DEHP             | 1.44               | [0.45; 4.62] | 0.94             | [0.23; 3.88] | 2.27                       | [0.58; 8.90] | 1.38                                 | [0.41; 4.65]  | 0.32               | [0.07; 1.40] | 1.25                   | [0.39; 4.04] | 2.01                   | [0.66; 6.14] |

Abbreviations: ∑DEHP: molecular sum of di(2-ethylhexyl) phthalate metabolites, CI: confidence interval, OR: odds ratio, MBP: mono-n-butyl phthalate, MBzP: monobenzyl phthalate, MCNP: monocarboxy-isononyl phthalate, MCOP: monocarboxy-isoocetyl phthalate, MCPP: mono(3-carboxypropyl) phthalate, MEP: monoethyl phthalate, MiBP: mono-isobutyl phthalate, ∑dichlorophenols : molecular sum of 2,4 and 2,5-dichlorophenols, ∑Parabens : molecular sum of methyl, ethyl, propyl and butyl parabens.

Table S11: Overview of the results from previous studies that explored the associations between prenatal exposure to bisphenol A and child behavior using assessments similar to the one used in our study

| <b>Cohort</b> | <b>Study</b> | <b>Age</b> | <b>N</b>           | <b>Behavioral assessments</b>                                                                       | <b>Trends observed</b>                                                                                                                                                                                                  |
|---------------|--------------|------------|--------------------|-----------------------------------------------------------------------------------------------------|-------------------------------------------------------------------------------------------------------------------------------------------------------------------------------------------------------------------------|
| EDEN          | This study   | 3 and 5    | 529 boys           | Strengths and Difficulties Questionnaire                                                            | <u>In boys:</u> Increased hyperactivity-inattention and externalizing behavior scores (5 yrs). Increased relationship problems and internalizing behavior scores (3 yrs)                                                |
| INMA          | Casas 2015   | 4 and 7    | 438 boys and girls | McCarthy Scales of Children's Abilities<br>ADHD Criteria of DSM-IV                                  | <u>In boys:</u> Increased hyperactivity and inattention scores (4 yrs)<br><u>In girls:</u> Decreased inattention scores (4 yrs)                                                                                         |
| CHAMACOS      | Harley 2013  | 7 to 9     | 292 boys and girls | Behavior Assessment System for Children 2<br>Conners' ADHD/DSM-IV Scales                            | <u>In boys:</u> Increased internalizing, aggressive, depression, anxiety scores.<br><u>In girls:</u> No clear association                                                                                               |
| SFFII         | Evans 2014   | 6 to 10    | 153 boys and girls | Child Behavior Check List ( CBCL)                                                                   | <u>In boys:</u> Increased internalizing, externalizing, somatic, oppositional/defiant problem scores<br><u>In girls:</u> No clear association                                                                           |
| CCCEH         | Perera 2012  | 3 to 5     | 198 boys and girls | Child Behavior Checklist (CBCL)                                                                     | <u>In boys:</u> Increased internalizing, externalizing, emotionally reactive, aggressive behavior scores<br><u>In girls:</u> Decreased anxious-depressed, aggressive behavior scores                                    |
| CCCEH         | Roen 2015    | 7 to 9     | 250 boys and girls | Child Behavior Check List (CBCL)                                                                    | <u>In boys:</u> Increased internalizing, externalizing, anxious/depressed, withdrawn/depressed, somatic complaints, rule-breaking and aggressive behavior scores.<br><u>In girls:</u> Decreased internalizing problems. |
| CCCEH         | Perera 2016  | 10 to 12   | 241 boys and girls | Revised Children's Manifest Anxiety Scale (RCMAS)<br>Children's Depression Rating Scale (CDRS)      | <u>In boys:</u> Increased depression and anxiety scores<br><u>In girls:</u> No clear association                                                                                                                        |
| HOME          | Braun 2011   | 2          | 244 boys and girls | Behavioral assessment for children<br>Behavior Rating Inventory of Executive Function-<br>Preschool | <u>In boys:</u> no clear association<br><u>In girls:</u> Increased externalizing behavior                                                                                                                               |

## References

- Braun JM, Kalkbrenner AE, Calafat AM, Yolton K, Ye XY, Dietrich KN, et al. 2011. Impact of Early-Life Bisphenol A Exposure on Behavior and Executive Function in Children. *Pediatrics* 128(5): 873-882.
- Casas M, Forns J, Martinez D, Avella-Garcia C, Valvi D, Ballesteros-Gomez A, et al. 2015. Exposure to bisphenol A during pregnancy and child neuropsychological development in the INMA-Sabadell cohort. *Environmental research* 142: 671-679.
- Evans SF, Kobrosly RW, Barrett ES, Thurston SW, Calafat AM, Weiss B, et al. 2014. Prenatal bisphenol A exposure and maternally reported behavior in boys and girls. *Neurotoxicology* 45: 91-99.
- Harley KG, Gunier RB, Kogut K, Johnson C, Bradman A, Calafat AM, et al. 2013. Prenatal and early childhood bisphenol A concentrations and behavior in school-aged children. *Environmental research* 126: 43-50.
- Mortamais M, Chevrier C, Philippat C, Petit C, Calafat AM, Ye X, et al. 2012. Correcting for the influence of sampling conditions on biomarkers of exposure to phenols and phthalates: a 2-step standardization method based on regression residuals. *Environmental health : a global access science source* 11(1): 29.
- Perera F, Vishnevetsky J, Herbstman JB, Calafat AM, Xiong W, Rauh V, et al. 2012. Prenatal bisphenol a exposure and child behavior in an inner-city cohort. *Environmental health perspectives* 120(8): 1190-1194.
- Perera F, Nolte EL, Wang Y, Margolis AE, Calafat AM, Wang S, et al. 2016. Bisphenol A exposure and symptoms of anxiety and depression among inner city children at 10-12 years of age. *Environmental research* 151: 195-202.
- Roen EL, Wang Y, Calafat AM, Wang S, Margolis A, Herbstman J, et al. 2015. Bisphenol A exposure and behavioral problems among inner city children at 7-9 years of age. *Environmental research* 142: 739-745.
- The Strengths and Difficulties Questionnaire website. Available: <http://www.sdqinfo.com/a0.html> [accessed 12 April 2017].
